# Supplementary material
Source: PubMed Central journal article supplement (PMC7448772)
Supplement: mmc2.pdf [file mmc2.pdf]

## Electronic supplementary material

### “Fear of the coronavirus and the stock markets”

**Table A1:** Descriptive statistics – sample of April 1 – July 31

|                                                  | <i>US</i> | <i>UK</i> | <i>JP</i> | <i>FR</i> | <i>IN</i> | <i>CA</i> | <i>DE</i> | <i>CH</i> | <i>KR</i> | <i>AU</i> |
|--------------------------------------------------|-----------|-----------|-----------|-----------|-----------|-----------|-----------|-----------|-----------|-----------|
| Panel A: Logarithm of realized variance          |           |           |           |           |           |           |           |           |           |           |
| Mean                                             | 5.96      | 5.99      | 5.65      | 6.29      | 6.09      | 5.66      | 6.36      | 5.54      | 5.84      | 5.69      |
| SD                                               | 0.81      | 0.69      | 0.78      | 0.65      | 0.88      | 0.89      | 0.7       | 0.57      | 0.74      | 0.68      |
| Median                                           | 6.01      | 5.96      | 5.68      | 6.29      | 5.99      | 5.55      | 6.33      | 5.46      | 5.67      | 5.62      |
| $\rho(1)$                                        | 0.48      | 0.37      | 0.22      | 0.37      | 0.38      | 0.44      | 0.36      | 0.29      | 0.05      | 0.29      |
| $\rho(10)$                                       | -0.02     | 0.16      | 0.12      | 0.12      | 0.27      | 0.16      | 0.11      | 0.11      | 0.05      | 0.26      |
| Panel B: Local abnormal search volume intensity  |           |           |           |           |           |           |           |           |           |           |
| Mean                                             | -0.03     | -0.02     | -0.03     | 0         | -0.02     | -0.03     | -0.02     | 0.01      | -0.01     | -0.02     |
| SD                                               | 0.07      | 0.09      | 0.14      | 0.13      | 0.07      | 0.1       | 0.11      | 0.18      | 0.16      | 0.1       |
| Median                                           | -0.04     | -0.03     | -0.02     | -0.01     | -0.02     | -0.04     | -0.03     | -0.03     | -0.01     | -0.03     |
| $\rho(1)$                                        | 0.66      | 0.35      | 0.31      | 0.2       | 0.25      | 0.11      | 0.07      | -0.07     | -0.06     | 0.16      |
| $\rho(10)$                                       | 0.3       | 0.15      | 0.14      | 0.2       | 0.17      | 0.32      | 0.09      | 0.2       | 0.25      | 0.31      |
| Panel C: Global abnormal search volume intensity |           |           |           |           |           |           |           |           |           |           |
| Mean                                             | -0.01     | -0.01     | -0.01     | -0.01     | -0.01     | -0.01     | -0.01     | -0.01     | -0.01     | -0.01     |
| SD                                               | 0.08      | 0.08      | 0.08      | 0.07      | 0.08      | 0.08      | 0.08      | 0.07      | 0.07      | 0.08      |
| Median                                           | -0.03     | -0.02     | -0.02     | -0.03     | -0.02     | -0.02     | -0.03     | -0.03     | -0.02     | -0.02     |
| $\rho(1)$                                        | 0.11      | 0.09      | -0.02     | 0.12      | 0.03      | 0.09      | 0.09      | 0.14      | 0.16      | 0.12      |
| $\rho(10)$                                       | 0.12      | 0.42      | 0.43      | 0.48      | 0.43      | 0.29      | 0.3       | 0.28      | 0.43      | 0.48      |

*Notes:  $\rho(\cdot)$  is the autocorrelation coefficient at the given order.*

**Table A2:** Realized variance model with search volume intensity – sample of April 1 – July 31

|                                                           | <i>US</i>                | <i>UK</i>               | <i>JP</i>                | <i>FR</i>               | <i>IN</i>                | <i>CA</i>               | <i>DE</i>               | <i>CH</i>               | <i>KR</i>                | <i>AU</i>                |
|-----------------------------------------------------------|--------------------------|-------------------------|--------------------------|-------------------------|--------------------------|-------------------------|-------------------------|-------------------------|--------------------------|--------------------------|
| Panel A: Benchmark model                                  |                          |                         |                          |                         |                          |                         |                         |                         |                          |                          |
| Intercept                                                 | <b>1.73<sup>b</sup></b>  | <b>2.73<sup>c</sup></b> | <b>2.09<sup>b</sup></b>  | <b>3.37<sup>c</sup></b> | <b>2.19<sup>c</sup></b>  | <b>1.96<sup>c</sup></b> | <b>2.98<sup>c</sup></b> | <b>3.56<sup>c</sup></b> | <b>4.01<sup>c</sup></b>  | <b>2.20<sup>c</sup></b>  |
| daily variance – $\ln RV_t$                               | <b>0.40<sup>c</sup></b>  | <b>0.31<sup>b</sup></b> | 0.12                     | <b>0.34<sup>b</sup></b> | <b>0.21<sup>b</sup></b>  | <b>0.34<sup>b</sup></b> | <b>0.30<sup>b</sup></b> | <b>0.23<sup>b</sup></b> | 0.03                     | 0.15                     |
| weekly variance – $\ln RV_t^W$                            | <b>0.23<sup>a</sup></b>  | 0.18                    | <b>0.47<sup>b</sup></b>  | 0.06                    | <b>0.38<sup>c</sup></b>  | <b>0.24<sup>a</sup></b> | 0.17                    | 0.08                    | <b>0.27<sup>a</sup></b>  | <b>0.42<sup>b</sup></b>  |
| $R^2$                                                     | 0.24                     | 0.14                    | 0.13                     | 0.13                    | 0.22                     | 0.21                    | 0.13                    | 0.07                    | 0.03                     | 0.16                     |
| adj. $R^2$                                                | 0.21                     | 0.12                    | 0.10                     | 0.11                    | 0.19                     | 0.19                    | 0.1                     | 0.04                    | 0.00                     | 0.13                     |
| EL test                                                   | 0.95                     | 0.92                    | 0.88                     | 0.96                    | 0.94                     | 0.63                    | 0.79                    | 0.99                    | 0.94                     | 0.97                     |
| White's test                                              | 0.55                     | 0.29                    | 0.47                     | 0.82c                   | 0.95                     | 0.61                    | 0.19                    | 0.39                    | 0.32                     | 0.89                     |
| Panel B: Search volume intensity model – local searching  |                          |                         |                          |                         |                          |                         |                         |                         |                          |                          |
| Intercept                                                 | <b>1.72<sup>b</sup></b>  | <b>2.91<sup>c</sup></b> | <b>1.99<sup>b</sup></b>  | <b>3.43<sup>b</sup></b> | <b>2.14<sup>c</sup></b>  | <b>1.98<sup>b</sup></b> | <b>2.92<sup>b</sup></b> | <b>3.52<sup>c</sup></b> | <b>3.80<sup>c</sup></b>  | <b>2.17<sup>c</sup></b>  |
| daily variance – $\ln RV_t$                               | <b>0.40<sup>c</sup></b>  | <b>0.29<sup>b</sup></b> | 0.12                     | 0.33                    | <b>0.20<sup>b</sup></b>  | <b>0.34<sup>b</sup></b> | <b>0.30<sup>b</sup></b> | <b>0.24<sup>b</sup></b> | 0.02                     | 0.15                     |
| weekly variance – $\ln RV_t^W$                            | <b>0.23<sup>c</sup></b>  | 0.16                    | <b>0.49<sup>b</sup></b>  | 0.07                    | <b>0.39<sup>c</sup></b>  | <b>0.24<sup>c</sup></b> | 0.18                    | 0.08                    | <b>0.31<sup>a</sup></b>  | <b>0.43<sup>b</sup></b>  |
| Local abnormal searching – $ASVA_t^{local}$               | 0.27                     | -0.59                   | 0.66                     | -0.39                   | 0.55                     | -0.29                   | -0.48                   | 0.31                    | <b>-1.20<sup>c</sup></b> | 0.28                     |
| $R^2$                                                     | 0.24                     | 0.15                    | 0.14                     | 0.14                    | 0.22                     | 0.21                    | 0.14                    | 0.08                    | 0.09                     | 0.16                     |
| adj. $R^2$                                                | 0.20                     | 0.11                    | 0.10                     | 0.10                    | 0.18                     | 0.18                    | 0.10                    | 0.04                    | 0.05                     | 0.12                     |
| EL test                                                   | 0.95                     | 0.92                    | 0.86                     | 0.90                    | 0.95                     | 0.62                    | 0.84                    | 0.85                    | 0.96                     | 0.98                     |
| White's test                                              | 0.37                     | 0.62                    | 0.32                     | 0.98                    | 0.55                     | 0.45                    | 0.22                    | 0.68                    | 0.54                     | 0.85                     |
| Panel C: Search volume intensity model – global searching |                          |                         |                          |                         |                          |                         |                         |                         |                          |                          |
| Intercept                                                 | <b>-1.86<sup>b</sup></b> | <b>2.68<sup>c</sup></b> | <b>2.14<sup>c</sup></b>  | <b>3.32<sup>c</sup></b> | <b>2.43<sup>c</sup></b>  | <b>2.19<sup>c</sup></b> | <b>2.80<sup>b</sup></b> | <b>3.55<sup>c</sup></b> | <b>3.99<sup>c</sup></b>  | <b>2.33<sup>c</sup></b>  |
| daily variance – $\ln RV_t$                               | <b>0.37<sup>c</sup></b>  | <b>0.30<sup>b</sup></b> | 0.11                     | <b>0.34<sup>b</sup></b> | <b>0.20<sup>b</sup></b>  | <b>0.31<sup>b</sup></b> | <b>0.31<sup>c</sup></b> | <b>0.23<sup>b</sup></b> | 0.04                     | 0.13                     |
| weekly variance – $\ln RV_t^W$                            | <b>0.24<sup>c</sup></b>  | 0.19                    | <b>0.47<sup>a</sup></b>  | 0.07                    | <b>0.35<sup>b</sup></b>  | <b>0.24<sup>a</sup></b> | 0.19                    | 0.08                    | 0.27                     | <b>0.42<sup>b</sup></b>  |
| Global abnormal searching – $ASVA_t^{global}$             | -1.33                    | 0.75                    | <b>-1.40<sup>a</sup></b> | 0.27                    | <b>-1.82<sup>a</sup></b> | -1.39                   | 0.89                    | 0.04                    | <b>-2.27<sup>b</sup></b> | <b>-1.34<sup>b</sup></b> |
| $R^2$                                                     | 0.25                     | 0.15                    | 0.14                     | 0.14                    | 0.24                     | 0.23                    | 0.14                    | 0.07                    | 0.07                     | 0.18                     |
| adj. $R^2$                                                | 0.22                     | 0.11                    | 0.10                     | 0.10                    | 0.21                     | 0.19                    | 0.10                    | 0.03                    | 0.03                     | 0.14                     |
| EL test                                                   | 0.99                     | 0.77                    | 0.87                     | 0.99                    | 0.97                     | 0.60                    | 0.69                    | 1.00                    | 0.84                     | 0.95                     |
| White's test                                              | 0.18                     | 0.44                    | 0.49                     | 0.95                    | 0.54                     | 0.16                    | 0.25                    | 0.71                    | 0.81                     | 0.43                     |

Notes: The superscripts *a*, *b*, and *c* denote statistical significance at the 10%, 5%, and 1% levels, using a random block length bootstrapping scheme with 1000 replications, as in ?. The EL's test is the *p*-value of the test of no serial correlation in the residuals of ?, and White's test is a nonparametric unweighted bootstrap test of no heteroscedasticity in residuals (?).
